# Supplementary material for: MicroRNA-33a-3p suppresses cell migration and invasion by directly targeting PBX3 in human hepatocellular carcinoma
Source: PubMed Central journal article supplement (PMC5173148; doi:10.18632/oncotarget.9886), 2016-06-07
Supplement: oncotarget-07-42461-s001.pdf [file oncotarget-07-42461-s001.pdf]

## MicroRNA-33a-3p suppresses cell migration and invasion by directly targeting PBX3 in human hepatocellular carcinoma

### SUPPLEMENTARY TABLES

Supplementary Table S1: Multivariate Cox regression analysis of clinicopathological features and miR-33a-3p expression in 85 HCC patients

| Variable               |         | Cases(n) | Multivariate COX analysis |         |
|------------------------|---------|----------|---------------------------|---------|
|                        |         |          | RR(95%CI)                 | P-value |
| <i>Sex</i>             | Male    | 74       | 0.641                     | 0.309   |
|                        | Female  | 11       | 0.273 – 1.509             |         |
| <i>Age (year)</i>      | ≤60     | 63       | 1.319                     | 0.527   |
|                        | >60     | 22       | 0.560 – 3.108             |         |
| <i>Cirrhosis</i>       | Absent  | 27       | 0.342                     | 0.021   |
|                        | Present | 58       | 0.138 – 0.848             |         |
| <i>Size (cm)</i>       | ≤5      | 45       | 3.014                     | 0.008   |
|                        | >5      | 40       | 1.328 - 6.843             |         |
| <i>Venous invasion</i> | Absent  | 63       | 0.459                     | 0.039   |
|                        | Present | 22       | 0.219 - 0.962             |         |
| <i>miR-33a-3p</i>      | High    | 46       | 1.108                     | 0.776   |
|                        | Low     | 39       | 0.546- 2.251              |         |

Abbreviation: RR: Relative risk, CI: Confidence interval

**Supplementary Table S2: Primers sequences***PolyA tailing qRT-PCR*

|                           |                                                          |
|---------------------------|----------------------------------------------------------|
| U6 forward primer         | 5'-CTCGCTTCGGCAGCACA-3'                                  |
| U6 reverse primer         | 5'-AACGCTTCACGAATTTGCGT-3'                               |
| oligodT adapter primer    | 5'-GCGAGCACAGAATTAATACGACTCACTATAGGTTTTTTTTTTTTTTTTVN-3' |
| Reverse primer            | 5'-GCGAGCACAGAATTAATACGAC-3'                             |
| miR-33a-3p forward primer | 5'-5'- CAATGTTTCCACAGTGCATCAC-3'                         |

*Q-PCR analysis of PBX3 and Alu*

|                              |                              |
|------------------------------|------------------------------|
| PBX3 forward primer          | 5'-CAAGTCGGAGCCAATGTG-3'     |
| PBX3 reverse primer          | 5'-ATGTAGCTCAGGGAAAAGTG-3'   |
| Human GAPDH forward primer   | 5'-GACCCCTTCATTGACCTCAAC-3'  |
| Human GAPDH reverse primer   | 5'-CTTCTCCATGGTGGTGAAGA-3'   |
| Alu forward primer           | 5'ACGCCTGTAATCCCAGCACTT-3'   |
| Alu reverse primer           | 5'TCGCCCAGGCTGGAGTGCA-3'     |
| Chicken GAPDH forward primer | 5'ACGCCATCACTATCTTCCAGGAG-3' |
| Chicken GAPDH reverse primer | 5'TACTTACCCCAGCCTTCTTG-3'    |

*PGL-control 3'-UTR recombinant plasmid construct*

|                            |                                               |
|----------------------------|-----------------------------------------------|
| PBX3 3'-UTR forward primer | 5'-TGCTCTAGACCGGTCTCTGGCCACACTTTTCCCTG        |
| PBX3 3'-UTR reverse primer | 5'-CGGAATTCATGCATACATATAACTACCACGAGGAAGAC     |
| Mut-PBX3 forward primer    | 5'- CGAGCACAAGGGTGCCA GGTCTTAATTCAACACAGGATCG |
| Mut-PBX3 reverse primer    | 5'- GACCTGGCACCCCTTGTGCTCGGTTTTTTAAAAGTTGCAAG |
